# Supplementary material for: Quantifying Trends in Disease Impact to Produce a Consistent and Reproducible Definition of an Emerging Infectious Disease
Source: PubMed Central journal article supplement (PMC3743838; doi:10.1371/journal.pone.0069951), 2013-08-14
Supplement: pone.0069951.s001.pdf [file pone.0069951.s001.pdf]

## Supplemental Online Figures

**Note:** For all figures, data on number of reported cases per year have been obtained from the Gideon database (<http://www.gideononline.com/>). Maps show countries for which the current trend (ending in 2010) of a disease is emerging (red), receding (green), no significant trend (yellow) or no cases reported (white). The segments of the time series are colored in the same way. See methods for additional details.

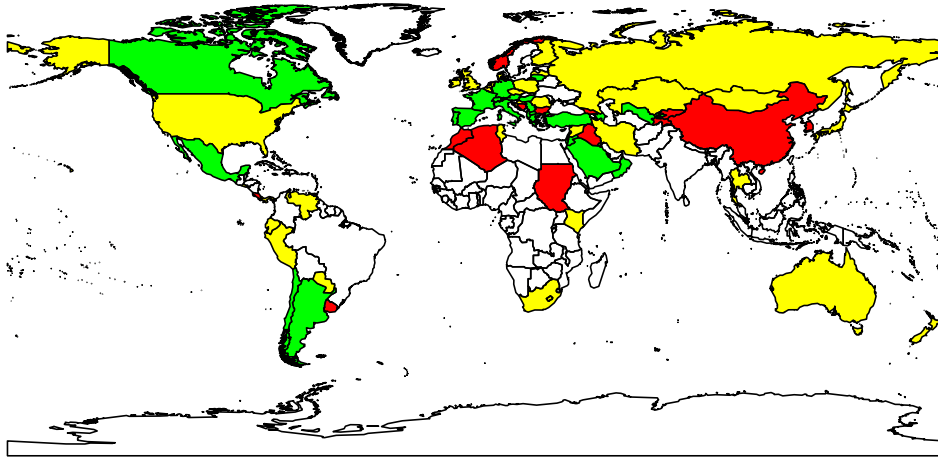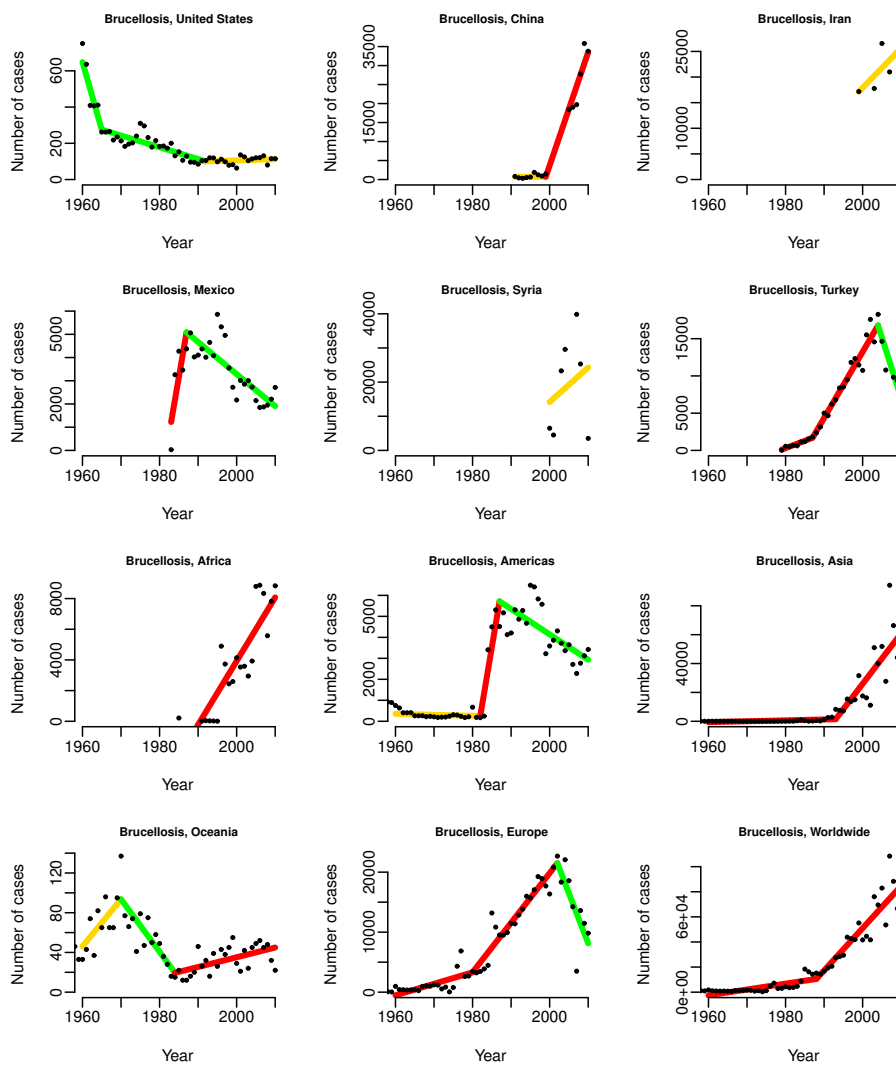

Figure S1: Brucellosis

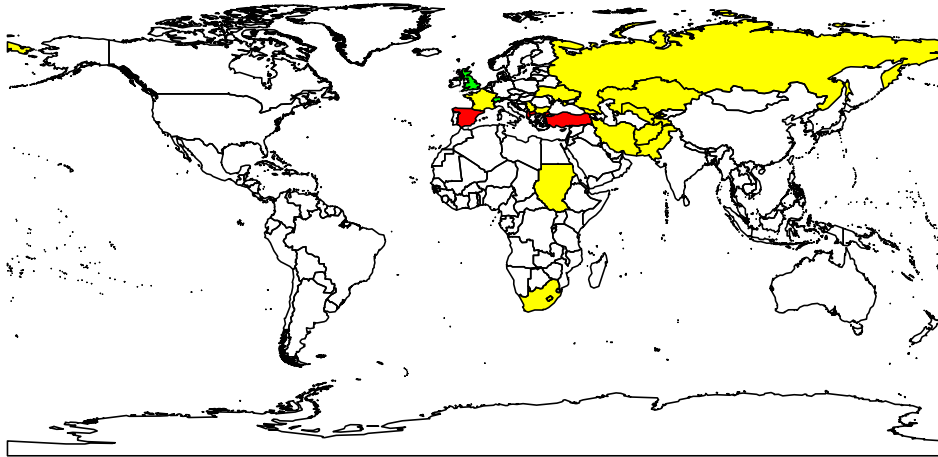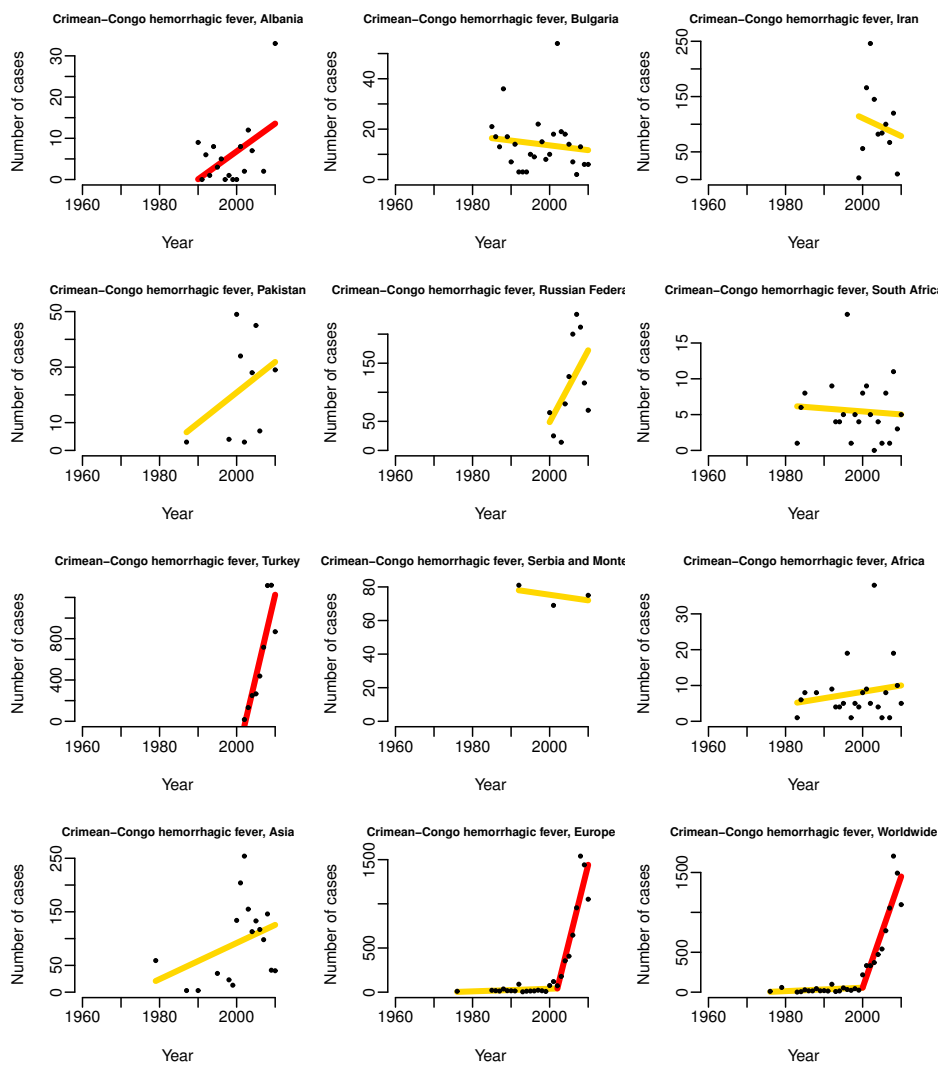

Figure S2: Crimean-Congo hemorrhagic fever

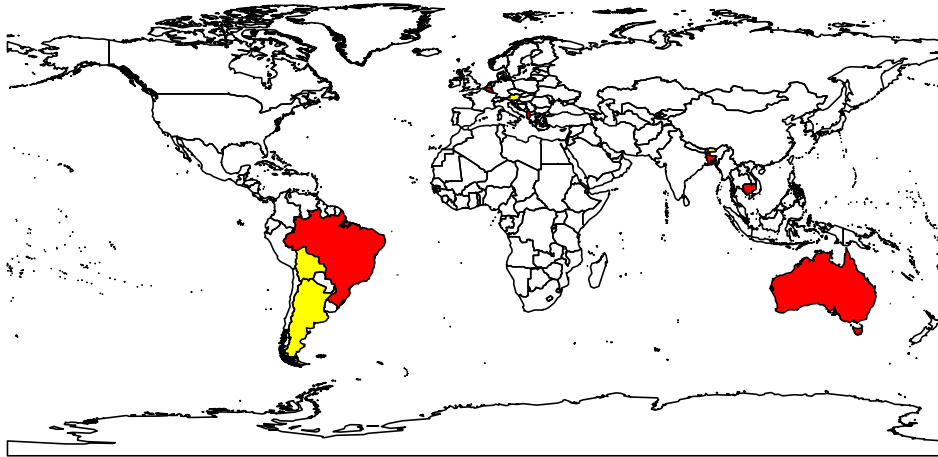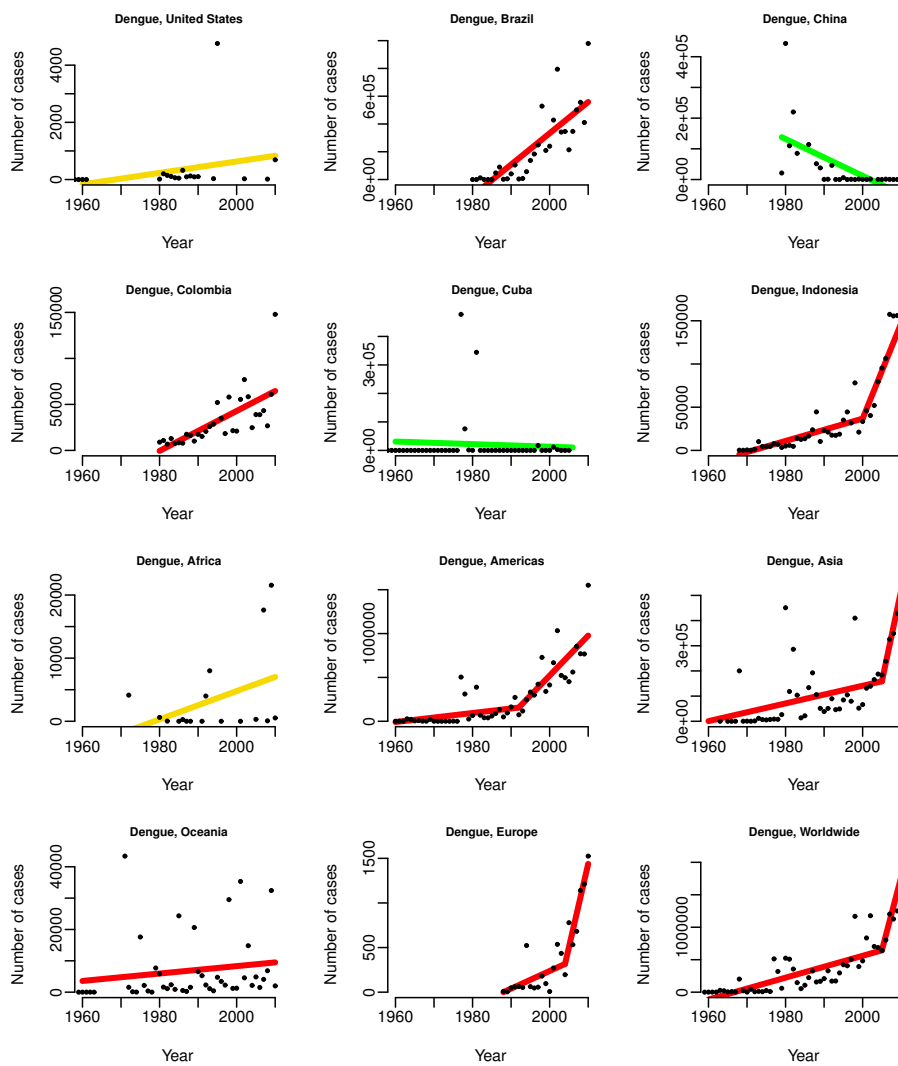

Figure S3: Dengue

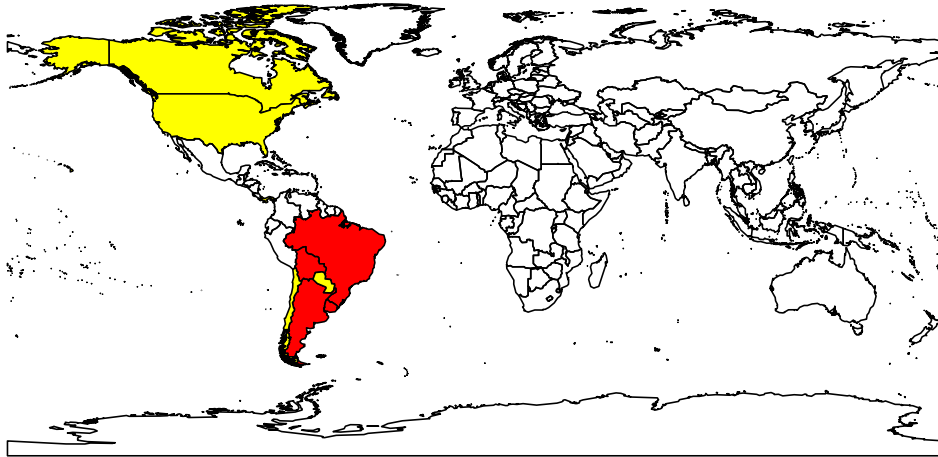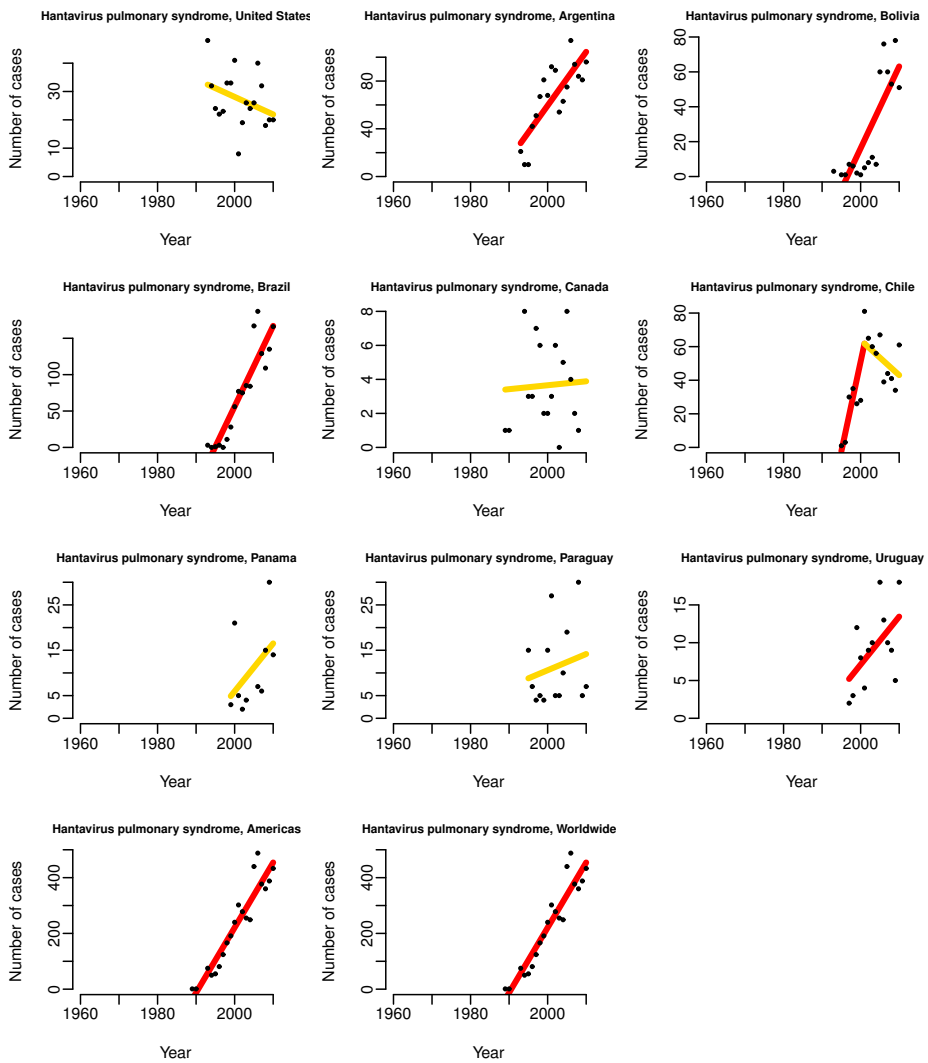

Figure S4: Hantavirus pulmonary syndrome

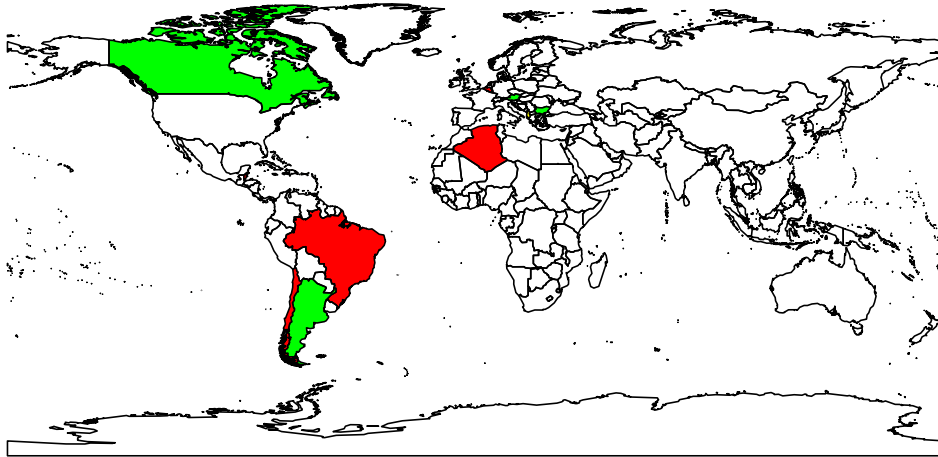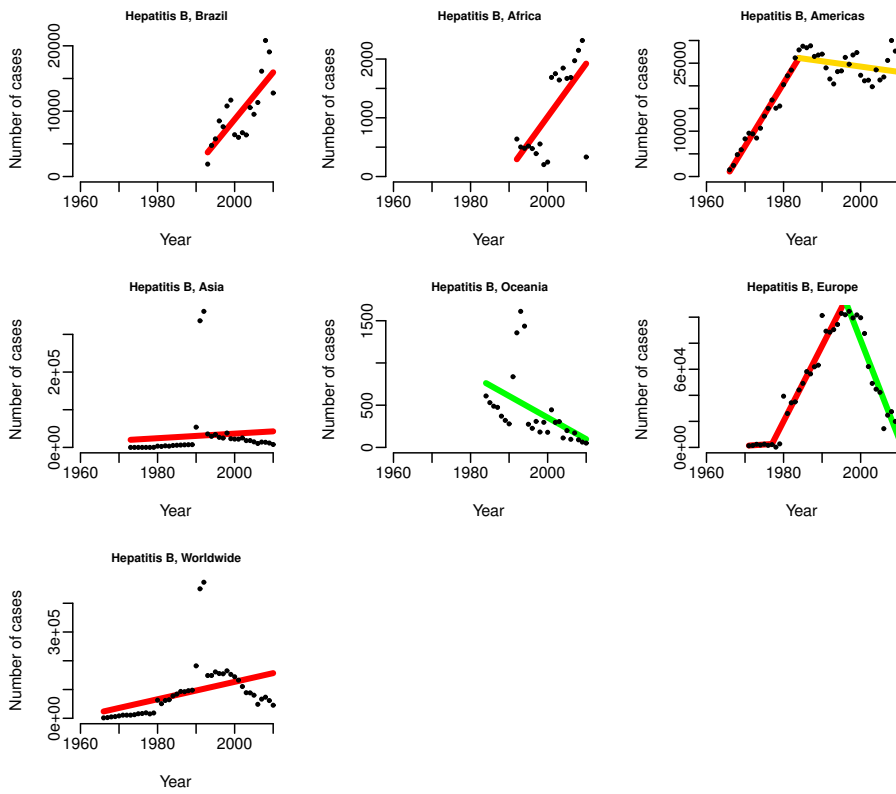

Figure S5: Hepatitis B

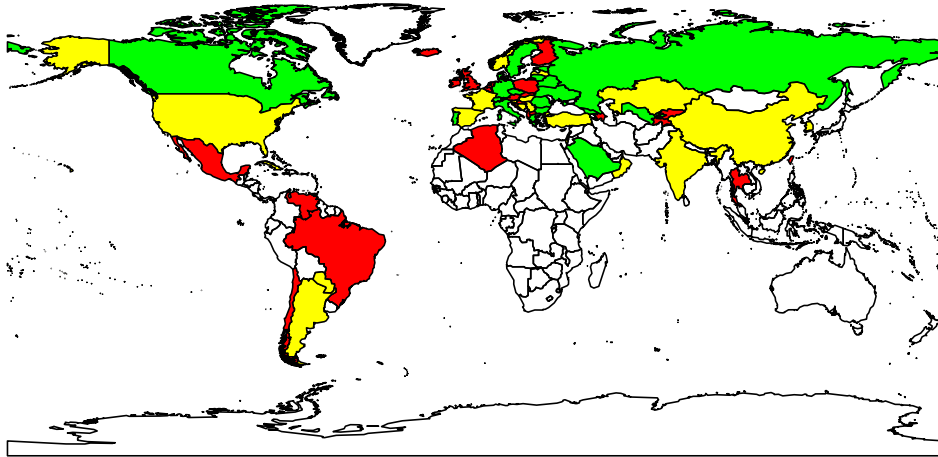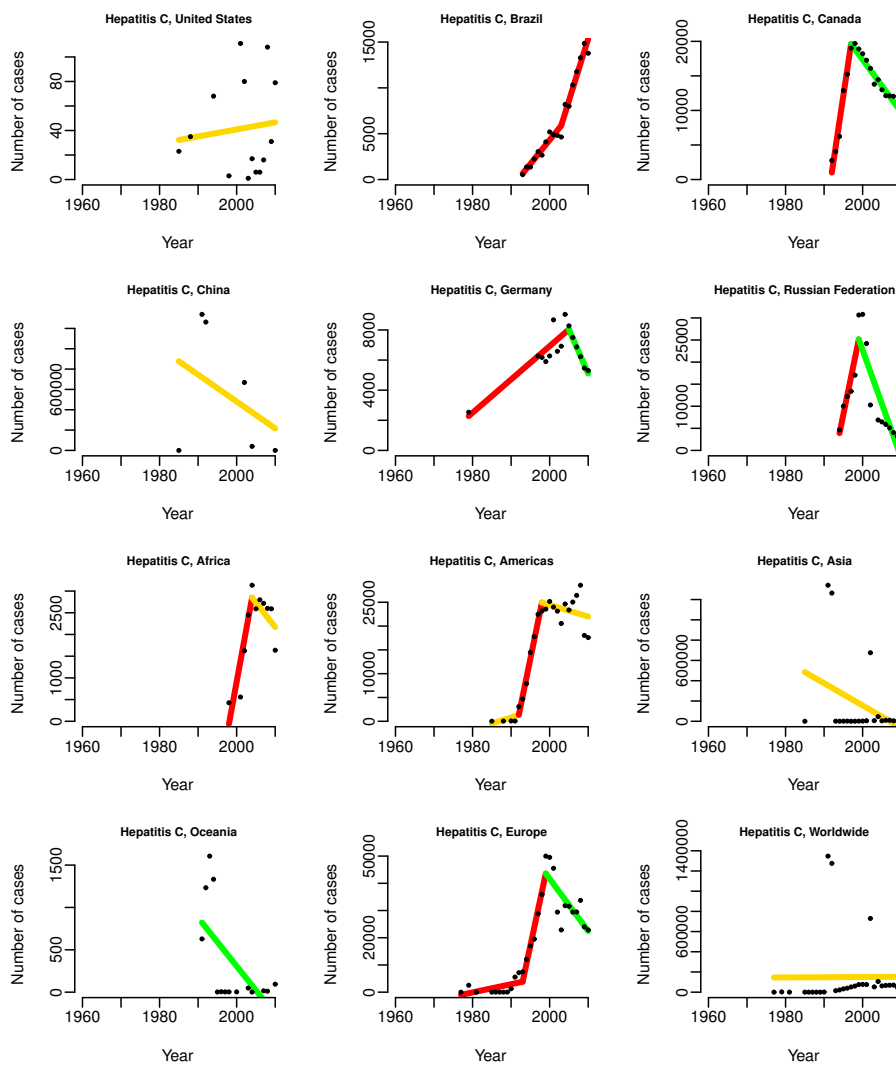

Figure S6: Hepatitis C

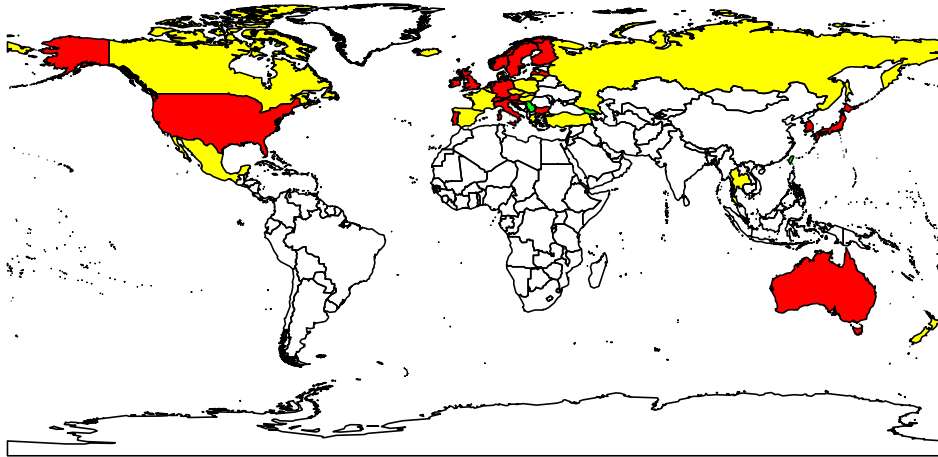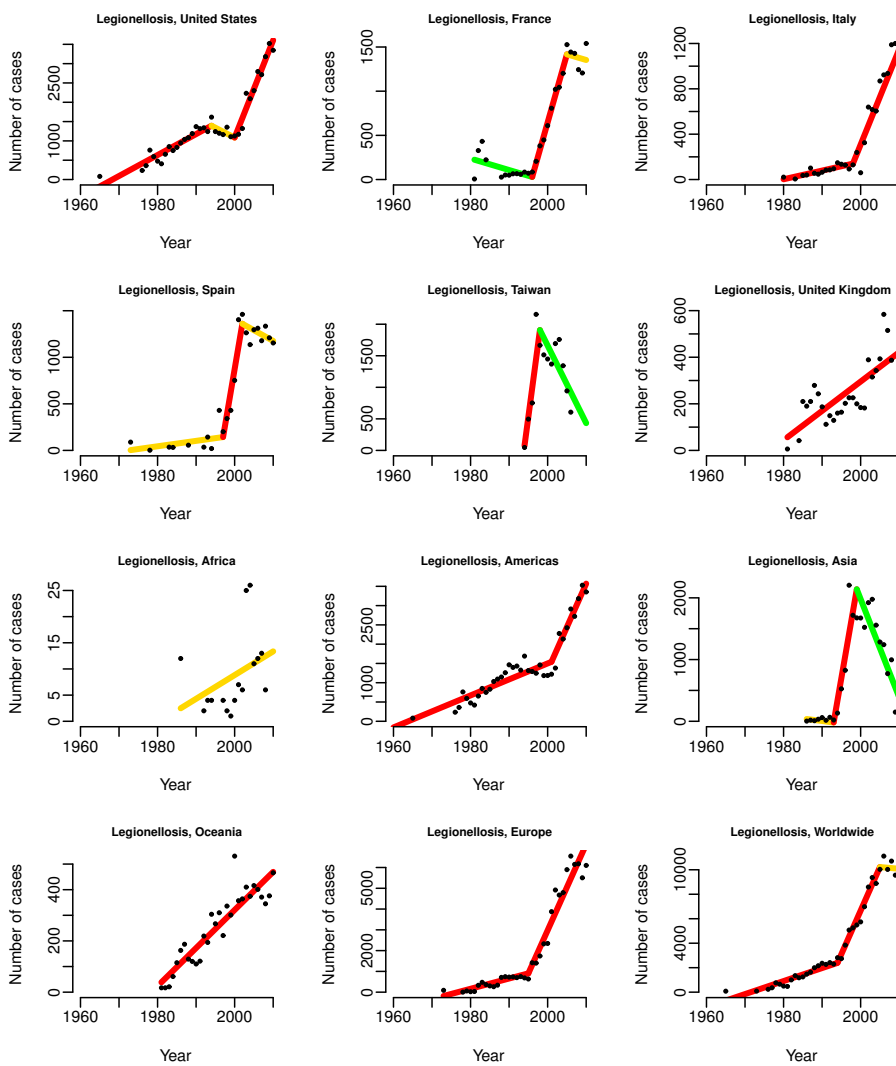

Figure S7: Legionellosis



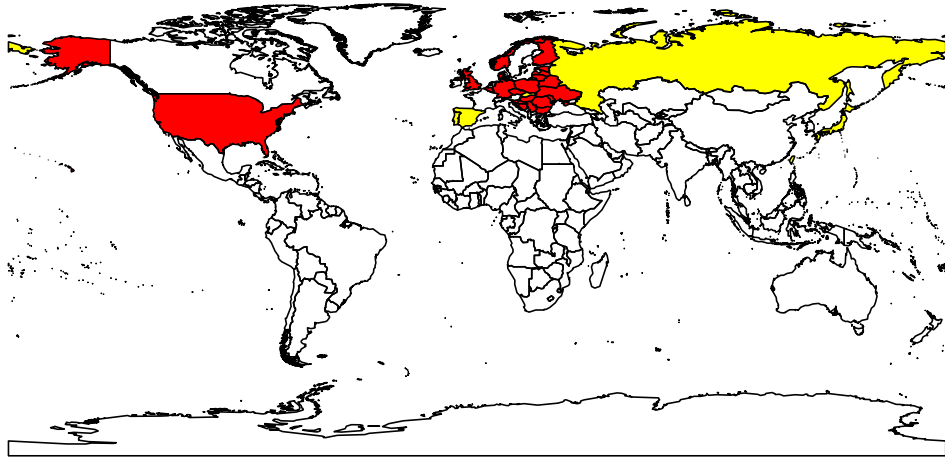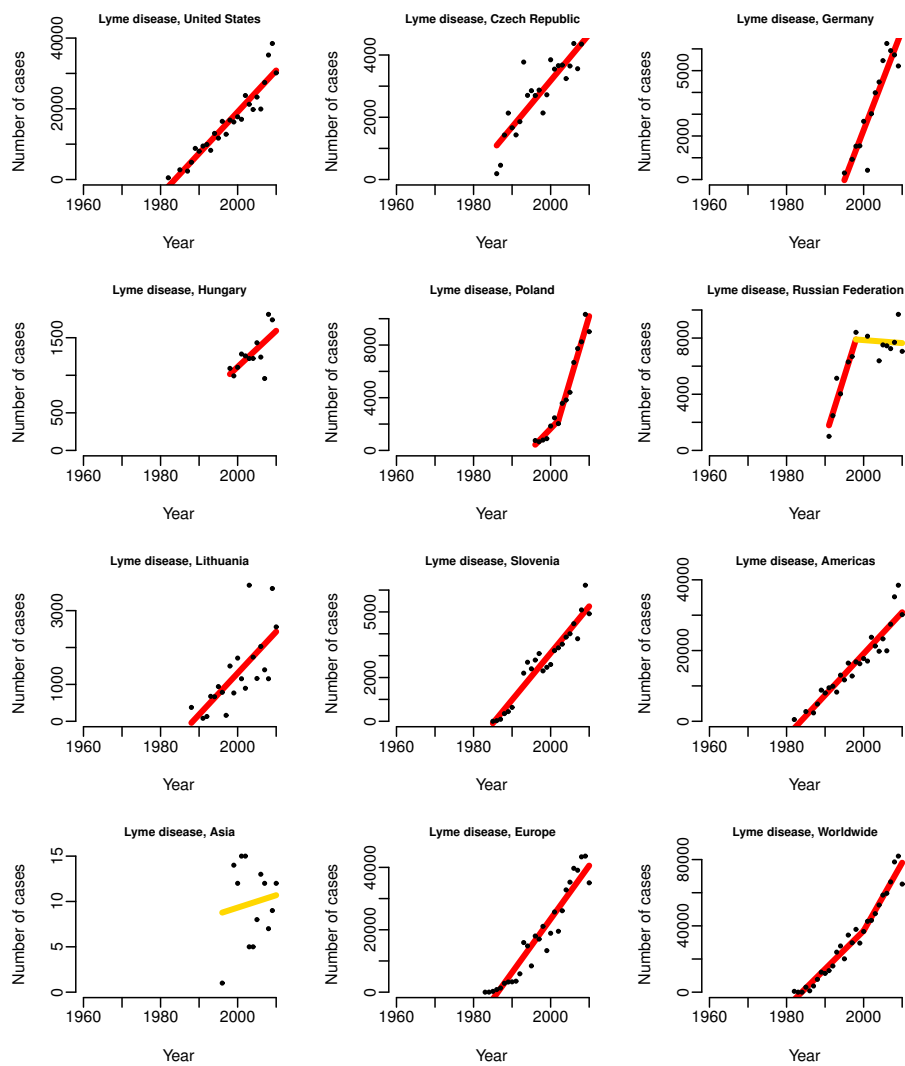

Figure S8: Lyme disease

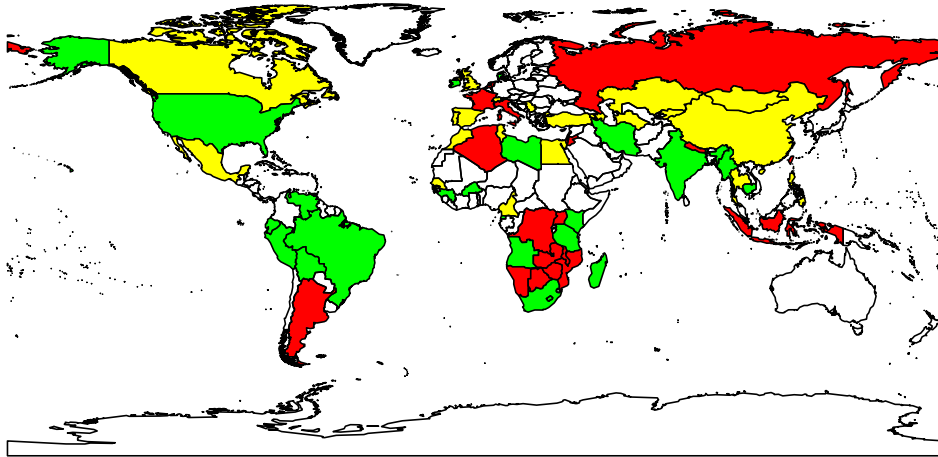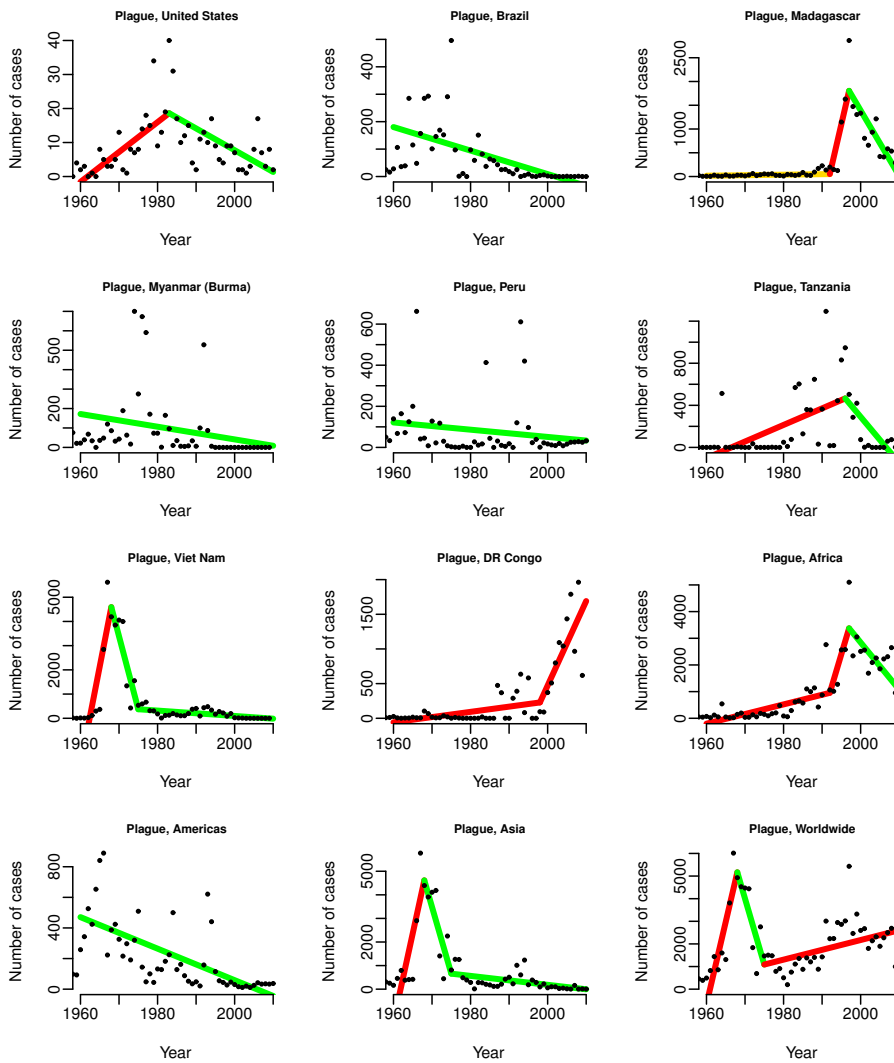

Figure S9: Plague

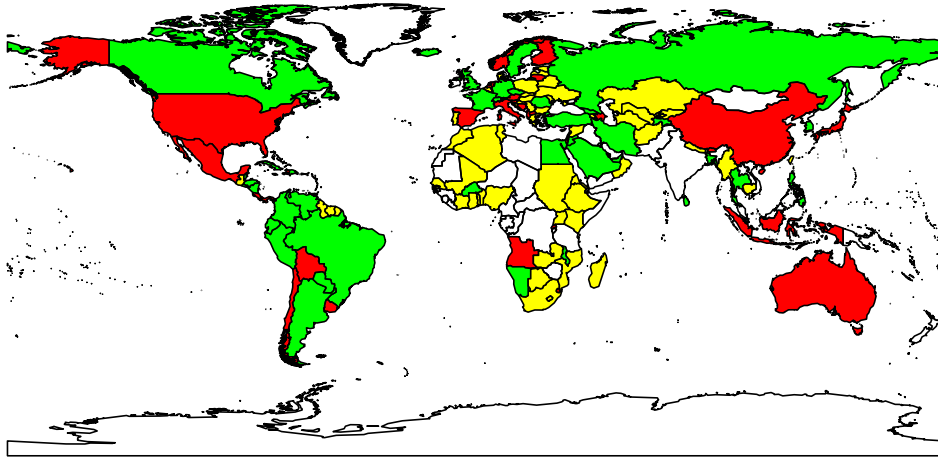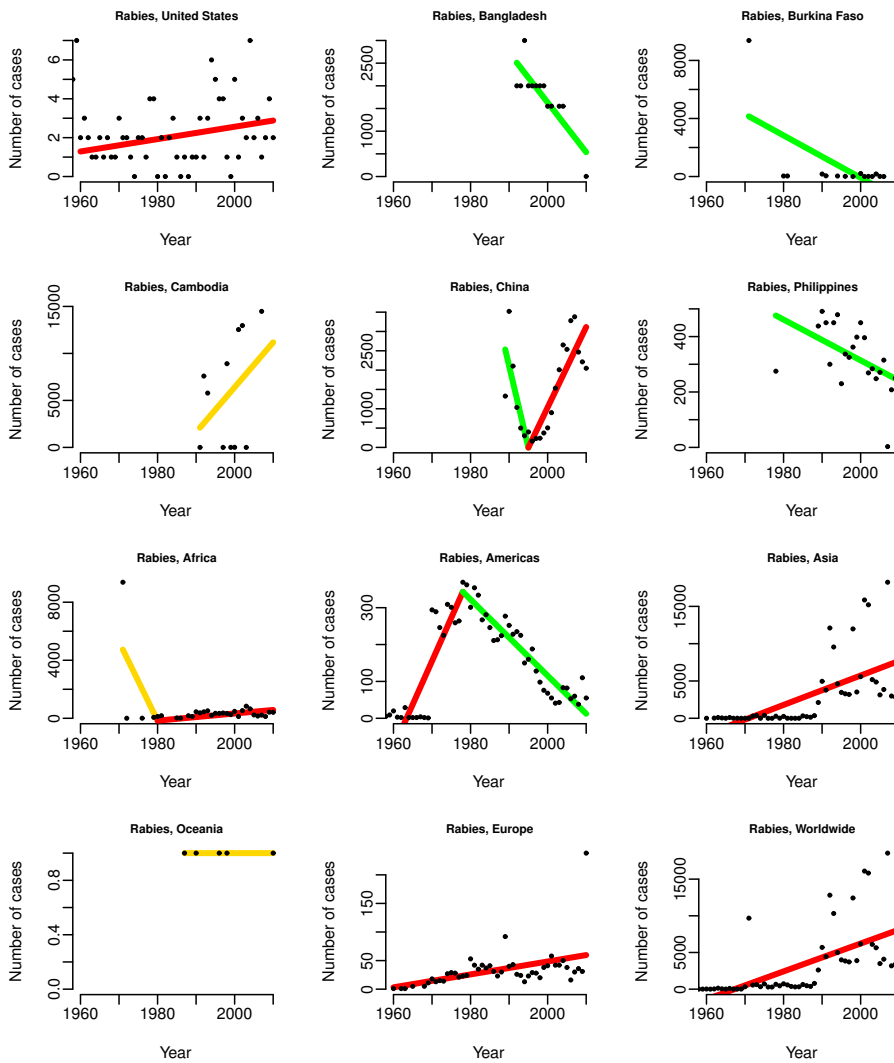

Figure S10: Rabies

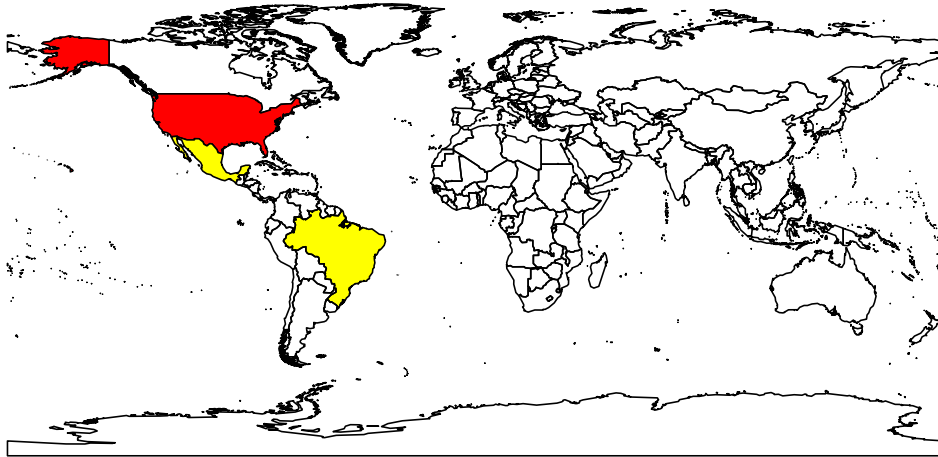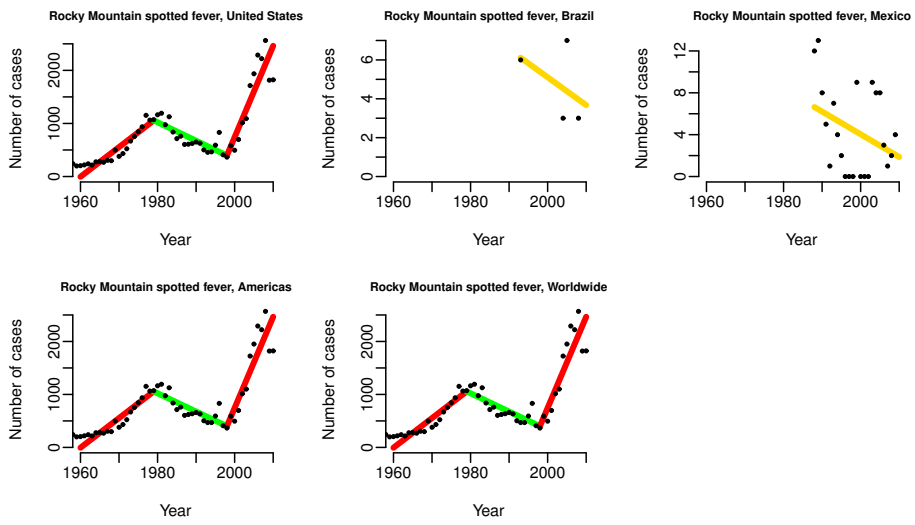

Figure S11: Rocky Mountain spotted fever

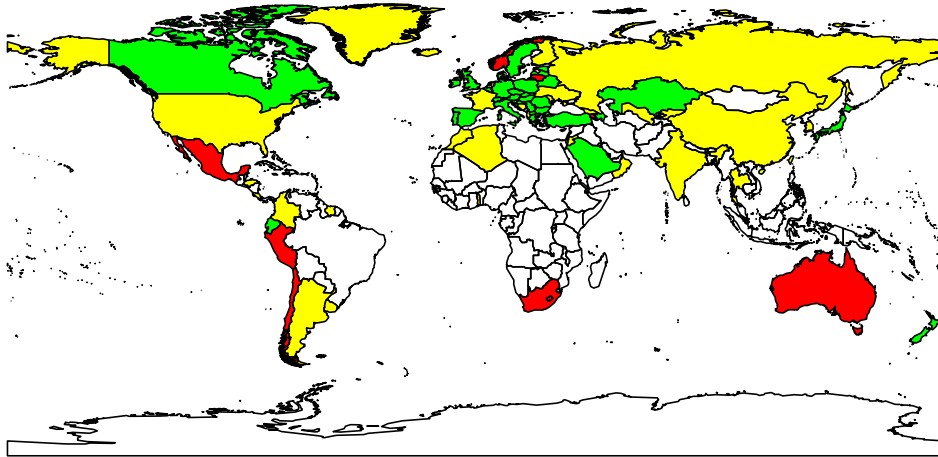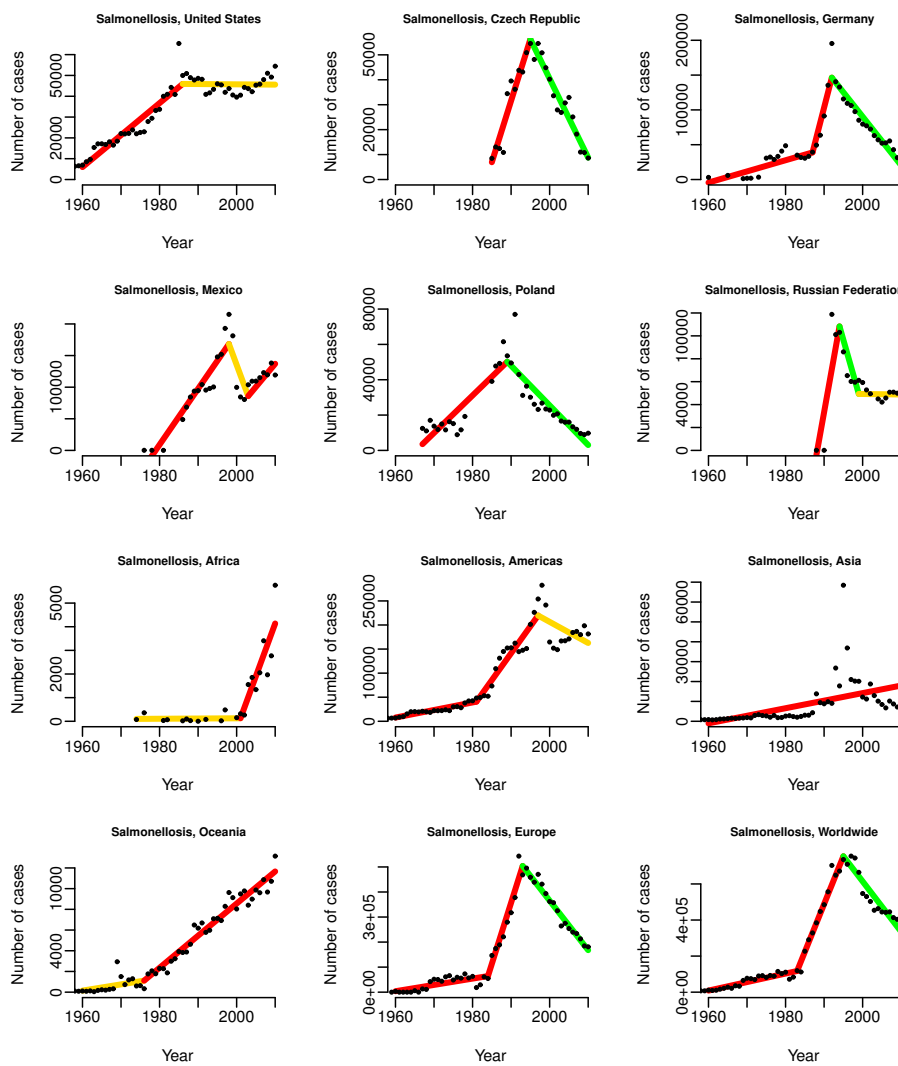

Figure S12: Salmonellosis
